# Supplementary material
Source: Research Square preprint supplement (doi:10.21203/rs.3.rs-9624571/v1)
Supplement: Supplementary file 1 [file a252441d475e5e525c8c1d86.docx]

**Table 1. Demographic Characteristics and Anthropometric Measurements of Children and Parents**

| **Variable** | **Group** | **n** | **±Ss** | **t** | **p** |
| --- | --- | --- | --- | --- | --- |
| **Height (m)** | HSS | 59 | 1,11±0,07 | -1,11 | 0,27 |
| LSS | 50 | 1,13±0,06 |
| **Body weight (kg)** | HSS | 59 | 19,95±3,54 | -0,30 | 0,77 |
| LSS | 50 | 20,14±3,04 |
| **BMI (kg/m²)** | HSS | 59 | 16,01±1,96 | 0,52 | 0,60 |
| LSS | 50 | 15,82±1,81 |
| **Body weight according to age**  **percentile** | HSS | 59 | 42,71±32,00 | -0,42 | 0,67 |
| LSS | 50 | 45,28±31,46 |
| **Body weight according to age**  **z-score** | HSS | 59 | -0,28±1,20 | -0,53 | 0,60 |
| LSS | 50 | -0,17±1,05 |
| **Height according to age**  **percentile** | HSS | 59 | 31,22±31,78 | -1,13 | 0,26 |
| LSS | 50 | 38,14±32,15 |
| **Height according to age**  **z-score** | HSS | 59 | -0,84±1,30 | -1,17 | 0,24 |
| LSS | 50 | -0,55±1,20 |
| **BMI according to age**  **percentile** | HSS | 59 | 57,70±29,51 | 0,24 | 0,81 |
| LSS | 50 | 56,30±31,38 |
| **BMI according to age**  **z-score** | HSS | 59 | 0,35±1,15 | 0,53 | 0,60 |
| LSS | 50 | 0,23±1,17 |
|  | | **Girl** | **Boy** |  | |
| **Gender** | HSS n (%) | 28 (47,5) | 31 (52,5) | X2:0,22; p:0,64 | |
| LSS  n (%) | 26 (52) | 24 (28) |

***HSS: Esenyurt; LSS: Gaziosmanpaşa;*** ***n: Number; X̅: Mean; Ss: Standard Deviation; t: Independent samples t-test Χ²: Chi-square test***

**Table 2. Evaluation of the Relationship Between Children's Energy and Nutrient Intake Taken by School**

| **Energy/Nutrient Value** | **School** | | **Test Value**  **t-p** |
| --- | --- | --- | --- |
| **HSS** | **LSS** |
| ±Ss | ±Ss |
| **Energy (kkal)** | 1304,35±101,29 | 1086,07±84,28 | t:12,10;p:<0,01 |
| **Protein (%)** | 16,33±1,88 | 15,02±1,44 | t:4,02;p:<0,01 |
| **Protein (g)** | 51,73±8,13 | 39,61±4,75 | t:9,28;p:<0,01 |
| **Carbohydrate (%)** | 39,77±3,46 | 43,72±3,87 | t:-5,62;p:<0,01 |
| **Carbohydrate (g)** | 125,90±11,28 | 115,80±13,49 | t:4,26;p:<0,01 |
| **Fat (%)** | 44,07±3,44 | 41,22±3,68 | t:4,18;p:<0,01 |
| **Fat (g)** | 63,93±7,86 | 50,22±6,08 | t:10,05;p:<0,01 |
| **Fiber (g)** | 12,78±9,20 | 9,04±1,66 | t:2,84;**p:0,01** |
| **Vitamin B₁₂ (mcg)** | 6,69±23,60 | 2,93±0,57 | t:1,13;p:**0,26** |
| **Vitamin A (mcg)** | 674,22±121,77 | 558,26±134,17 | t:4,73;p:<0,01 |
| **Vitamin C (mg)** | 59,09±17,17 | 47,35±11,53 | t:4,11;p:<0,01 |
| **Vitamin D (mcg)** | 2,11±2,48 | 1,40±1,30 | t:1,84;**p:0,07** |
| **Vitamin E (mg)** | 7,12±1,87 | 4,85±1,06 | t:7,60;p:<0,01 |
| **Vitamin K (mg)** | 54,71±30,76 | 49,01±32,25 | t:0,94;p:0,35 |
| **Vitamin B₁ (mg)** | 0,64±0,09 | 0,50±0,08 | t:8,18;p:<0,01 |
| **Vitamin B₂ (mg)** | 1,14±0,18 | 0,97±0,16 | t:5,06;p:<0,01 |
| **Vitamin B₆ (mg)** | 1,06±0,17 | 0,79±0,13 | t:9,57;p:<0,01 |
| **Folate (mg)** | 204,20±114,45 | 138,85±25,13 | t:3,96;p:<0,01 |
| **Sodium (mg)** | 2282,98±508,43 | 1988,51±345,47 | t:3,47;p:<0,01 |
| **Potassium (mg)** | 1765,53±246,44 | 1446,07±161,90 | t:7,84;p:<0,01 |
| **Calcium (mg)** | 612,21±102,47 | 558,88±101,48 | t:2,72;**p:0,01** |
| **Magnesium (mg)** | 194,53±42,94 | 148,96±21,41 | t:6,82;p:<0,01 |
| **Phosphorus (mg)** | 856,27±121,19 | 678,77±86,13 | t:8,66;p:<0,01 |
| **Iron (mg)** | 6,96±2,34 | 5,19±1,08 | t:4,92;p:<0,01 |
| **Zinc (mg)** | 7,17±1,52 | 5,58±0,78 | t:6,66;p:<0,01 |
| **Omega 3 (g)** | 1,32±0,70 | 0,98±0,27 | t:3,25;p:<0,01 |
| **Omega 6 (g)** | 8,61±3,43 | 5,38±1,36 | t:6,26;p:<0,01 |

***HSS: Esenyurt; LSS: Gaziosmanpaşa;*** ***t: Independent samples t-test; X̅: Mean; Ss: Standard Deviation***

**Table 3. Evaluation of the Relationship Between Children's Daily Energy and Nutrient Intake and Household Food Accessibility Scale Scores**

| **Energy/Nutrient Value** | **Test Value** | **Household Food Accessibility Scale Score** | |
| --- | --- | --- | --- |
| **HSS** | **LSS** |
| **Energy (kkal)** | r | 0,11 | -0,12 |
| p | 0,39 | 0,40 |
| **Protein (g)** | r | 0,03 | 0,02 |
| p | 0,81 | 0,91 |
| **Carbohydrate (g)** | r | 0,21 | -0,14 |
| p | 0,11 | 0,33 |
| **Fat (g)** | r | 0,05 | -0,05 |
| p | 0,68 | 0,73 |
| **Fiber (g)** | r | 0,07 | -0,12 |
| p | 0,58 | 0,40 |
| **Vitamin B₁₂ (mcg)** | r | -0,07 | -0,07 |
| p | 0,62 | 0,63 |
| **Vitamin A (mcg)** | r | -0,17 | 0,00 |
| p | 0,20 | 0,98 |
| **Vitamin C (mg)** | r | 0,08 | -0,09 |
| p | 0,56 | 0,56 |
| **Vitamin D (mcg)** | r | 0,01 | 0,04 |
| p | 0,95 | 0,78 |
| **Vitamin E (mg)** | r | -0,05 | 0,05 |
| p | 0,70 | 0,72 |
| **Vitamin K (mg)** | r | -0,15 | -0,10 |
| p | 0,27 | 0,51 |
| **Vitamin B₁ (mg)** | r | -0,17 | -0,04 |
| p | 0,20 | 0,80 |
| **Vitamin B₂ (mg)** | r | -0,04 | -0,12 |
| p | 0,77 | 0,40 |
| **Vitamin B₆ (mg)** | r | -0,02 | 0,14 |
| p | 0,88 | 0,33 |

**Table 3. Evaluation of the Relationship Between Children's Daily Energy and Nutrient Intake and Household Food Accessibility Scale Scores (Continued)**

| **Energy/Nutrient Value** | **Test Value** | **Household Food Accessibility Scale Score** | |
| --- | --- | --- | --- |
| **HSS** | **LSS** |
| **Folate (mg)** | r | -0,10 | -0,15 |
| p | 0,44 | 0,29 |
| **Sodium (mg)** | r | -0,19 | -0,07 |
| p | 0,15 | 0,61 |
| **Potassium (mg)** | r | -0,02 | 0,08 |
| p | 0,86 | 0,58 |
| **Calcium (mg)** | r | -0,04 | -0,10 |
| p | 0,78 | 0,48 |
| **Magnesium (mg)** | r | -0,14 | -0,06 |
| p | 0,30 | 0,66 |
| **Phosphorus (mg)** | r | -0,02 | -0,06 |
| p | 0,86 | 0,70 |
| **Iron (mg)** | r | -0,12 | 0,00 |
| p | 0,37 | 0,98 |
| **Zinc (mg)** | r | -0,10 | -0,15 |
| p | 0,47 | 0,31 |
| **Omega 3 (g)** | r | -0,07 | -0,01 |
| p | 0,58 | 0,95 |
| **Omega 6 (g)** | r | 0,14 | -0,02 |
| p | 0,28 | 0,90 |

***HSS: Esenyurt; LSS: Gaziosmanpaşa;* r: Pearson correlation**

**Table 4. Evaluation of the Relationship Between Children's Daily Energy and Nutrient Intake Values ​​and YETBİD Scale Subscale Scores**

| **Energy/Nutrient Value** | **Test Value** | **HSS** | | **LSS** | |
| --- | --- | --- | --- | --- | --- |
| **YETBİD (Basic Nutrition and Food-Health Information)** | **YETBİD (Food Preference)** | **YETBİD (Basic Nutrition and Food-Health Information)** | **YETBİD (Food Preference)** |
| **Energy (kkal)** | r | -0,01 | -0,06 | -0,22 | 0,00 |
| p | 0,95 | 0,67 | 0,12 | 1,00 |
| **Protein (g)** | r | 0,10 | 0,03 | -0,18 | 0,01 |
| p | 0,44 | 0,80 | 0,20 | 0,92 |
| **Carbohydrate (g)** | r | 0,00 | -0,11 | -0,22 | -0,01 |
| p | 0,99 | 0,41 | 0,13 | 0,97 |
| **Fat (g)** | r | 0,06 | -0,03 | -0,04 | 0,00 |
| p | 0,67 | 0,82 | 0,78 | 0,99 |
| **Fiber (g)** | r | -0,18 | 0,14 | -0,19 | -0,08 |
| p | 0,17 | 0,28 | 0,18 | 0,60 |
| **Vitamin B₁₂ (mcg)** | r | -0,18 | 0,08 | -0,08 | 0,12 |
| p | 0,17 | 0,55 | 0,60 | 0,41 |
| **Vitamin A (mcg)** | r | 0,16 | 0,10 | 0,00 | -0,04 |
| p | 0,22 | 0,46 | 0,97 | 0,81 |
| **Vitamin C (mg)** | r | 0,07 | -0,09 | -0,22 | -,290* |
| p | 0,58 | 0,47 | 0,12 | **0,04** |
| **Vitamin D (mcg)** | r | 0,09 | 0,05 | 0,20 | 0,22 |
| p | 0,48 | 0,73 | 0,15 | 0,13 |
| **Vitamin E (mg)** | r | -,274* | -0,04 | 0,02 | -0,15 |
| p | **0,04** | 0,74 | 0,91 | 0,30 |
| **Vitamin K (mg)** | r | 0,05 | -0,02 | -0,25 | -0,16 |
| p | 0,68 | 0,86 | 0,08 | 0,26 |
| **Vitamin B₁ (mg)** | r | -0,04 | 0,06 | -0,25 | 0,16 |
| p | 0,75 | 0,65 | 0,08 | 0,25 |
| **Vitamin B₂ (mg)** | r | 0,10 | -0,03 | -0,21 | -0,04 |
| p | 0,47 | 0,82 | 0,14 | 0,78 |
| **Vitamin B₆ (mg)** | r | 0,08 | 0,00 | -,335* | -0,07 |
| p | 0,56 | 1,00 | **0,02** | 0,64 |

**Table 4. Evaluation of the Relationship Between Children's Daily Energy and Nutrient Intake Values ​​and YETBİD Scale Subscale Scores (Continued)**

| **Energy/Nutrient** | **Test Value** | **HSS** | | **LSS** | |
| --- | --- | --- | --- | --- | --- |
| **YETBİD (Basic Nutrition and Food-Health Information)** | **YETBİD (Food Preference)** | **YETBİD (Basic Nutrition and Food-Health Information)** | **YETBİD (Food Preference)** |
| **Folate (mg)** | r | -0,16 | 0,07 | -,302* | -0,21 |
| p | 0,23 | 0,62 | **0,03** | 0,14 |
| **Sodium (mg)** | r | -0,03 | -0,01 | -0,09 | 0,00 |
| p | 0,83 | 0,95 | 0,53 | 0,99 |
| **Potassium (mg)** | r | 0,10 | -0,04 | -,341* | -0,12 |
| p | 0,47 | 0,74 | **0,02** | 0,40 |
| **Calcium (mg)** | r | 0,09 | 0,03 | -0,17 | -0,06 |
| p | 0,51 | 0,82 | 0,23 | 0,67 |
| **Magnesium (mg)** | r | -0,05 | 0,05 | -,387** | -0,10 |
| p | 0,69 | 0,73 | **0,01** | 0,50 |
| **Phosphorus (mg)** | r | 0,15 | -0,06 | -0,23 | 0,01 |
| p | 0,25 | 0,64 | 0,10 | 0,96 |
| **Iron (mg)** | r | 0,05 | 0,04 | -0,21 | 0,03 |
| p | 0,72 | 0,74 | 0,14 | 0,81 |
| **Zing(mg)** | r | 0,04 | -0,13 | -,290* | -0,01 |
| p | 0,77 | 0,33 | **0,04** | 0,93 |
| **Omega 3 (g)** | r | -0,05 | 0,06 | -0,17 | -0,11 |
| p | 0,69 | 0,65 | 0,24 | 0,44 |
| **Omega 6 (g)** | r | -0,09 | -0,10 | -0,12 | -0,11 |
| p | 0,52 | 0,45 | 0,41 | 0,43 |

***HSS: Esenyurt; LSS: Gaziosmanpaşa;* r: Pearson correlation; **p<0,05 **p<0,01***
